# Supplementary material
Source: HighWire-hosted journal article supplement (https://svn.smart01.highwire.org/content/svn-2023-002956)
Supplement: inline-supplementary-material-1 [file inline-supplementary-material-1.pdf]

## Supplementary Materials

### Supplementary Methods

#### Construction of SAH model

The study design and the number of mice used are shown in Supplementary Table 2. Mice were anesthetized by isoflurane inhalation (4% for induction and 1% for maintenance). The rectal temperature was maintained at  $37.0 \pm 0.5$  °C. A 5-0 monofilament nylon suture was inserted into the left internal carotid artery and used to perforate the bifurcation of the middle cerebral artery. Similar procedures (without perforation) were performed in a sham group.

#### Behavioral Tests

To evaluate neurological deficits after SAH, the Garcia Score, grip test, rotarod test, and pole test assessments were performed.<sup>1-3</sup> For Garcia Score, mice spontaneous activity, limb movement symmetry, forelimb outstretching, climbing, body proprioception and vibrissae reflex were assessed. The higher score indicates a better neurological function. For grip test, mice were placed on a horizontal wooden pole with two vertical supports about 40 cm in height. Mice were scored according to number of limbs gripping the pole. For rotarod test, mice were placed on an accelerating rotating rod, whose initial speed was 5 rpm and acceleration was 0.2rpm/s. When the mice fell, the time was recorded. For pole test, mice were placed head up on the top of a 50 cm-vertical pole. The time taken for the mice to turn 180° was recorded as  $T_{\text{Turn}}$ , and the time to reach the bottom was recorded as  $T_{\text{Total}}$ . If the  $T_{\text{Turn}} > 60\text{s}$ , or the mice fell or slipped, then  $T_{\text{Turn}}$  and  $T_{\text{Total}}$  were respectively recorded as 60s and 75s.

#### Administration of recombinant Mouse TIMP1, Transduction of Adeno-Associated Virus

##### (AAV) Vector

Recombinant mouse TIMP1 (rm-TIMP1) was intraperitoneally administered at a dose of 250 µg/kg daily.<sup>4</sup> The first dose was administered at SAH onset, and treatment was continued for 3 days.

The coding sequence region of mouse TIMP1 was cloned into AAV for overexpression (AAV-TIMP1). An siRNA oligomer targeting mouse  $\beta 1$ -Integrin (5'-3' sense:

GAACCACAGAAGUUUACAUTT; antisense: AUGUAAACUUCUGUGGUUCTT; designed by GenePharma, Shanghai) was cloned into an miR30-based shRNA expression vector, then packed into AAV for silencing (AAV-si $\beta$ 1). Five injection locations were selected,<sup>5, 6</sup> and  $1 \times 10^{13}$  units of AAV were injected at each position. The coordinates (relative to bregma) were as follows: 2 locations in the frontoparietal cortex (1 mm posterior, 0.5 mm ventral, 0.5/2.5 mm left lateral), 2 locations in the temporal cortex (1 mm posterior, 5 mm ventral, 0.5/2.5 mm left lateral), and 1 location in the hippocampus (2 mm posterior, 1 mm ventral, 1.5 mm left lateral). For mice that received both AAV-TIMP1 and AAV-si $\beta$ 1, injections of the two AAV vectors were conducted 1 week apart. At 4 weeks after the last injection, mice were subjected to sham or SAH surgery. The transduction efficacies were determined by quantitative reverse transcription polymerase chain reaction (qRT-PCR) analyses of astrocytes that had been magnetically isolated from brain tissues surrounding the injection locations.

### **Preparation of Single-Cell Suspensions, Flow Cytometry, and Cell Sorting**

Left brain hemispheres were digested with 3 mg/mL collagenase/dispase (Sigma-Aldrich, #11097113001), homogenized, and centrifuged in 30% Percoll (Cytiva, #17089109) to remove the myelin sheath; the resultant single-cell suspensions were used for flow cytometry analysis or cell sorting.<sup>7</sup>

For flow cytometry (FCM) analysis and fluorescence-activated cell sorting (FACS), single-cell suspensions were incubated with antibodies to cell-surface markers (Supplementary Table 3) for 30 min at 4 °C, then analyzed with a flow cytometer (CytoFLEX LX, Beckman) or sorted with a cell sorter (Aria SORP, BD). CytExpert and FlowJo softwares were used for data analysis. For magnetic-activated cell sorting (MACS) of astrocytes, single-cell suspensions were incubated with ACSA-2 microbeads (Miltenyi Biotec, #130-097-679) at 4 °C for 15 min, then filtered through Miltenyi  $\mu$ MACS™ Separator columns (Miltenyi Biotec, #130-042-201) for astrocyte collection.

### **Histology**

Histological analysis consisted of immunofluorescence and transmission electron microscopy (TEM). For immunofluorescence, 10- $\mu$ m-thick frozen coronal brain sections were labeled with

primary and fluorescent secondary antibodies (Supplementary Table 4). Images were captured with a fluorescence microscope (DM550, Leica) or a laser confocal microscope (STELLARIS5, Leica). For TEM analysis, tissue masses separated from the left temporal cortex were cut into 100-nm-thick sections, then stained with 2% uranyl acetate and lead citrate. Images were captured using a 120-kV transmission electron microscope (Tecnai 10, Thermo Fisher).

### Assessment of BBB Integrity

The integrity of the BBB was assessed by employing IgG leakage detection and brain water content measurement. For IgG leakage detection, brain frozen sections with a similar anatomical panel were immersed with Alexa Fluor™ 594-labeled anti-mouse IgG (1:500; Thermo Fisher, #A-21203). Samples were photographed by a laser confocal microscope (STELLARIS5, Leica), and the percentage of the stained areas were calculated. For brain water content measurement, the brain tissues were baked dry and the weight was compared before and after. The water content was then calculated using the formula  $(\text{Wet Weight} - \text{Dry Weight}) / \text{Wet Weight} \times 100\%$ .

### Cell Culture

For primary astrocyte culture,<sup>8</sup> cerebral cortex tissues from 1-day-old mice were digested with 0.25% trypsin to yield mixed-cell suspensions, and the suspensions were seeded in dishes and cultured in dulbecco's modified eagle medium (DMEM) containing 10% fetal bovine serum (FBS). After incubation for 2 weeks, the mixed cells were shaken at 200 rpm for 12 h to remove microglia; the remaining adherent cells were regarded as astrocytes.

For primary neuron culture,<sup>3</sup> cortices were dissected from E17 fetal mice. Tissues were digested with 0.25% trypsin, and the suspensions were seeded onto dishes coated with poly-L-lysine and cultured in neurobasal medium containing 1% B27 and 0.5 mmol/L glutamine. At 10 days after seeding, the neurons were obtained for further analysis.

For primary microglia culture,<sup>9</sup> cortices from 1-day-old mice were digested with 0.25% trypsin, and the suspensions were seeded in dishes and cultured in DMEM containing 10% FBS. After incubation for 2 weeks, the mixed cells were shaken at 200 rpm for 1 h to obtain microglia.

For primary endothelial cell culture,<sup>10</sup> cortices from 6-8 week old mice (no matter the sex) were homogenized and centrifuged in 15% Dextran-70 to obtain microvascular segments. The

segments were digested with DMEM containing 1% I-type collagenase, 0.25% trypsin and 1% DNase I. The obtained endothelial cells were cultured in DMEM containing 10% FBS.

### Red Blood Cell (RBC) Stimulation, Transfection, and Drug Administration

To mimic SAH *in vitro*, mouse RBCs were isolated from peripheral blood via centrifugation and incubated with the adherent astrocytes at a 10:1 ratio (RBCs : astrocytes) for 24 h.<sup>11</sup> Transfections of TIMP1 overexpression plasmid (GenePharma, Shanghai) and Trim21 siRNA (5'-3' sense: GUCUCCUUCUACAACAUAATT; antisense: UUAUGUUGUAGAAGGAGACTT; designed by GenePharma, Shanghai) were conducted 72 h before RBC stimulation using Lipofectamine™ 3000 (Invitrogen, #L3000001). The proteasome inhibitor MG132 (10 µM; Sigma-Aldrich, #M7449) and the autophagy inhibitor chloroquine (CQ, 10 µM; Sigma-Aldrich, #C6628) were added 8 h and 12 h, respectively, before sample collection.<sup>12, 13</sup> The protein synthesis inhibitor cycloheximide (CHX, 100 µg/mL; Sigma-Aldrich, #239763) was added 24 h after RBC stimulation. The samples were collected within 9 h after CHX administration.<sup>13</sup>

### RNA Extraction, qRT-PCR, and RNA Sequencing

Total RNA was extracted from brain tissues (left temporal cortex), sorted cells, and *in vitro* cultured cells. cDNA was obtained using a Reverse Transcription Kit (Takara, #RR036Q), and target genes were amplified using a SYBR Green qPCR Kit (Takara, #RR420Q). The primers used are shown in Supplementary Table 5.

For RNA sequencing, a next-generation sequencing library was constructed by BGI Genomics, Shenzhen. Data were cleaned with Cutadapt-1.9 software, and reads were mapped with HISAT2 2.0.4 software. The mapped reads were assembled using StringTie-1.3.4d software. Comprehensive transcriptomes were constructed using Gffcompare0.9.8 software. StringTie and ballgown (<http://www.bioconductor.org/packages/release/bioc/html/ballgown.html>) softwares were used to estimate the expression levels of all transcripts. Differentially expressed genes with fold change values > 2 or < 0.5 and P values < 0.05 were selected for further analysis.

### Immunoblotting, Immunoprecipitation, Shotgun Proteomics, and Molecular Docking



Proteins were extracted from brain tissues (left temporal cortex) and *in vitro* cultured cells. For immunoblotting, proteins were separated by electrophoresis and transferred to polyvinylidene fluoride membranes. The membranes were subsequently labeled with primary and horseradish peroxidase-conjugated secondary antibodies. For immunoprecipitation, proteins were precipitated with antibodies to bait proteins and Pierce Protein A/G Magnetic Beads (Invitrogen, #88803); the precipitates were detected by immunoblotting. The antibodies used are shown in Supplementary Table 6.

$\beta$ 1-Integrin antibody-precipitated samples from control or RBC-treated astrocytes were also used for shotgun proteomics (Genechem, Shanghai). Proteins present in both groups (i.e., shared proteins) were analyzed using the JVENN tool (<https://jvenn.toulouse.inra.fr/app/example.html>). Proteins related to ubiquitination pathways in the shared proteins were filtered by Gene Ontology (GO) enrichment analysis via Metascape software (<https://metascape.org/gp/index.html>). Potential interaction sites and modes between  $\beta$ 1-Integrin (PDB ID: 5XP0) and the E3 ubiquitin ligase Trim21 (PDB ID: 2VOK) were investigated via molecular docking analysis using the online tool HDock (<http://hdock.phys.hust.edu.cn/>).

### Enzyme-Linked Immunosorbent Assays

TIMP1 levels in human plasma (Boster Bio, #EK0520), mouse brain tissues (left temporal cortex), and plasma (Boster Bio, #EK0521) were detected by enzyme-linked immunosorbent assays. All procedures were performed in accordance with the manufacturer's instructions.

### Supplementary References

1. Bieber M, Gronewold J, Scharf AC, Schuhmann MK, Langhauser F, Hopp S, et al. Validity and reliability of neurological scores in mice exposed to middle cerebral artery occlusion. *Stroke*. 2019;50:2875-2882
2. Balkaya M, Krober JM, Rex A, Endres M. Assessing post-stroke behavior in mouse models of focal ischemia. *J Cereb Blood Flow Metab*. 2013;33:330-338
3. Tang T, Hu LB, Ding C, Zhang Z, Wang N, Wang T, et al. Src inhibition rescues fundc1-mediated neuronal mitophagy in ischaemic stroke. *Stroke Vasc Neurol*. 2023
4. Tang J, Kang Y, Huang L, Wu L, Peng Y. Timp1 preserves the blood-brain barrier through interacting with cd63/integrin beta 1 complex and regulating downstream fak/rhoa signaling. *Acta Pharm Sin B*. 2020;10:987-1003
5. Wang X, Wang Z, Wu J, Wang L, Li X, Shen H, et al. Thioredoxin 1 regulates the pentose

- phosphate pathway via atm phosphorylation after experimental subarachnoid hemorrhage in rats. *Brain Res Bull.* 2022;185:162-173
6. Zhou X, Wu Q, Lu Y, Zhang X, Lv S, Shao J, et al. Crosstalk between soluble pdgf-bb and pdgfrbeta promotes astrocytic activation and synaptic recovery in the hippocampus after subarachnoid hemorrhage. *FASEB J.* 2019;33:9588-9601
  7. Crouch EE, Doetsch F. Facs isolation of endothelial cells and pericytes from mouse brain microregions. *Nat Protoc.* 2018;13:738-751
  8. Qin X, Wang J, Chen S, Liu G, Wu C, Lv Q, et al. Astrocytic p75(ntr) expression provoked by ischemic stroke exacerbates the blood-brain barrier disruption. *Glia.* 2022;70:892-912
  9. Zhang L, Wei W, Ai X, Kilic E, Hermann DM, Venkataramani V, et al. Extracellular vesicles from hypoxia-preconditioned microglia promote angiogenesis and repress apoptosis in stroke mice via the tgf-beta/smad2/3 pathway. *Cell Death Dis.* 2021;12:1068
  10. Haileselassie B, Joshi AU, Minhas PS, Mukherjee R, Andreasson KI, Mochly-Rosen D. Mitochondrial dysfunction mediated through dynamin-related protein 1 (drp1) propagates impairment in blood brain barrier in septic encephalopathy. *J Neuroinflammation.* 2020;17:36
  11. Xu J, Chen Z, Yu F, Liu H, Ma C, Xie D, et al. Il-4/stat6 signaling facilitates innate hematoma resolution and neurological recovery after hemorrhagic stroke in mice. *Proc Natl Acad Sci U S A.* 2020;117:32679-32690
  12. Shen Z, Zheng Y, Wu J, Chen Y, Wu X, Zhou Y, et al. Park2-dependent mitophagy induced by acidic postconditioning protects against focal cerebral ischemia and extends the reperfusion window. *Autophagy.* 2017;13:473-485
  13. Yan Y, Wang X, Chaput D, Shin MK, Koh Y, Gan L, et al. X-linked ubiquitin-specific peptidase 11 increases tauopathy vulnerability in women. *Cell.* 2022;185:3913-3930 e3919

Supplementary Tables

Supplementary Table 1. Basic Characteristics of the Enrolled Patients

|                   | Control (n = 8) | SAH (n = 19) | p value |
|-------------------|-----------------|--------------|---------|
| Age, yrs          | 58.1 ± 10.3     | 56.4 ± 11.2  | 0.4098  |
| Male              | 25.0 (2/8)      | 31.6 (6/19)  | >0.9999 |
| Smoking           | 25.0 (2/8)      | 15.8 (3/19)  | 0.6159  |
| Hypertension      | 12.5 (1/8)      | 31.6 (6/19)  | 0.6334  |
| Hb, g/L           | 137.0 ± 8.8     | 139.5 ± 13.4 | 0.6532  |
| WBC, ×10^9 /L     | 5.6 ± 1.6       | 14.6 ± 6.5   | 0.0016  |
| PLT, ×10^9 /L     | 220.9 ± 62.5    | 206.2 ± 41.6 | 0.4996  |
| APTT, sec         | 32.4 ± 9.0      | 31.5 ± 4.9   | 0.0817  |
| Aneurysm Location |                 |              |         |
| ICA               | 37.5 (3/8)      | 5.3 (1/19)   | 0.0646  |
| MCA               | 0.0 (0/8)       | 21.1 (4/19)  | 0.2855  |
| AComA             | 12.5 (1/8)      | 36.8 (7/19)  | 0.3645  |
| PCoMA             | 12.5 (1/8)      | 15.8 (3/19)  | >0.9999 |
| VA                | 12.5 (1/8)      | 0.0 (0/19)   | 0.2963  |
| PCA               | 12.5 (1/8)      | 0.0 (0/19)   | 0.2963  |
| Other             | 12.5 (1/8)      | 21.1 (4/19)  | >0.9999 |
| Hunt-Hess Grade   | -               | 2.0 ± 1.0    | -       |
| GCS Score         | -               | 13.1 ± 3.3   | -       |

Hb, Hemoglobin; WBC, White Blood Cell; PLT, Platelet; APTT, Activated Partial Thromboplastin Time; ICA, Internal Carotid Artery; MCA, Middle Cerebral Artery; AComA, Anterior Communicating Artery; PCoMA, Posterior Communicating Artery; VA, Vertebral Artery; PCA, Posterior Cerebral Artery; GCS, Glasgow Coma Scale.

Supplementary Table 2. Study Design and Number of Mice Utilized

| Group              | Survived | Dead | Excluded | Total | Usage                                                                                                                                                                                                                                                                                                       |
|--------------------|----------|------|----------|-------|-------------------------------------------------------------------------------------------------------------------------------------------------------------------------------------------------------------------------------------------------------------------------------------------------------------|
| Experiment 1       |          |      |          |       | 1. RNA-seq (n = 5 for sham and n = 4 for SAH group)<br>2. qPCR in Figure 1C (n = 5 for each time point)<br>3. ELISA in Figure 1D (n = 6 for each group)<br>4. FACS in Figure S2A (n = 4 for SAH group)<br>5. MACS in Figure S2B (n = 5 for each group)                                                      |
| sham               | 21       | 0    | 1        | 22    |                                                                                                                                                                                                                                                                                                             |
| SAH                | 34       | 10   | 6        | 50    |                                                                                                                                                                                                                                                                                                             |
| Experiment 2       |          |      |          |       | 1. 18 mice in each group were subjected to behavioral tests.<br>2. 6 mice in each group were used for qPCR.<br>3. 6 mice in each group were used for WB.<br>4. 6 mice in each group were used for immunofluorescence.                                                                                       |
| sham (Vehicle, ♂)  | 18       | 0    | 0        | 18    |                                                                                                                                                                                                                                                                                                             |
| SAH (Vehicle, ♂)   | 18       | 4    | 3        | 25    |                                                                                                                                                                                                                                                                                                             |
| SAH (rm-TIMP1, ♂)  | 18       | 3    | 2        | 23    |                                                                                                                                                                                                                                                                                                             |
| sham (Vehicle, ♀)  | 18       | 0    | 0        | 18    |                                                                                                                                                                                                                                                                                                             |
| SAH (Vehicle, ♀)   | 18       | 2    | 0        | 20    |                                                                                                                                                                                                                                                                                                             |
| SAH (rm-TIMP1, ♀)  | 18       | 0    | 2        | 20    |                                                                                                                                                                                                                                                                                                             |
| Experiment 3       |          |      |          |       | To verify the transduction efficacies of the AAVs, astrocytes were sorted via MACS for qPCR analysis.                                                                                                                                                                                                       |
| AAV-Control        | 3        | 0    | 0        | 3     |                                                                                                                                                                                                                                                                                                             |
| AAV-TIMP1          | 3        | 0    | 0        | 3     |                                                                                                                                                                                                                                                                                                             |
| AAV-siβ1           | 3        | 0    | 0        | 3     |                                                                                                                                                                                                                                                                                                             |
| Experiment 4       |          |      |          |       | 1. FCM in Figure 5A (n = 3 for sham and n = 5 for SAH ± AAV-TIMP1 group)<br>2. 6 mice in each group were used for WB.<br>3. 6 mice in each group were used for immunofluorescence.<br>4. 6 mice in each group were used for detection of brain water content.<br>5. 3 mice in each group were used for TEM. |
| sham+AAV-Control   | 24       | 0    | 0        | 24    |                                                                                                                                                                                                                                                                                                             |
| SAH+AAV-Control    | 26       | 6    | 3        | 35    |                                                                                                                                                                                                                                                                                                             |
| SAH+AAV-TIMP1      | 26       | 2    | 0        | 28    |                                                                                                                                                                                                                                                                                                             |
| Experiment 5       |          |      |          |       | 1. 6 mice in each group were used for WB.<br>2. 6 mice in each group were used for immunofluorescence.<br>3. 3 mice in each group were used for TEM.<br>4. All mice used for above experiments were subjected to behavioral tests.<br>5. Samples were shared with Experiment 4.                             |
| sham+AAV-Control   | -        | -    | -        | -     |                                                                                                                                                                                                                                                                                                             |
| SAH+AAV-Control    | -        | -    | -        | -     |                                                                                                                                                                                                                                                                                                             |
| SAH+AAV-TIMP1      | -        | -    | -        | -     |                                                                                                                                                                                                                                                                                                             |
| AAV-TIMP1+AAV-siβ1 | 15       | 8    | 0        | 23    |                                                                                                                                                                                                                                                                                                             |

|       |     |    |    |     |   |
|-------|-----|----|----|-----|---|
| Total | 263 | 35 | 17 | 315 | - |
|-------|-----|----|----|-----|---|

Supplementary Table 3. Antibodies for FCM and FACS

| Antibodies       | Concentration | Manufacturer | Catalog No. |
|------------------|---------------|--------------|-------------|
| CD45-AF700       | 1:100         | Biolegend    | 147716      |
| CD11b-PE-Cy7     | 1:100         | Biolegend    | 260002      |
| ACSA-2-PE        | 1:50          | Miltenyi     | 130-123-284 |
| CD31-APC         | 1:100         | Biolegend    | 160209      |
| β1-Integrin-FITC | 1:100         | Biolegend    | 102206      |

Supplementary Table 4. Antibodies for Immunofluorescence

| Antibodies  | Concentration | Manufacturer | Catalog No. |
|-------------|---------------|--------------|-------------|
| NeuN        | 1:500         | Abcam        | ab104224    |
| CD31        | 1:100         | R & D        | AF3628      |
| GFAP        | 1:500         | Abcam        | ab279290    |
| Iba1        | 1:250         | Abcam        | ab283346    |
| β1-Integrin | 1:100         | Proteintech  | 12594-1-AP  |
| ZO-1        | 1:250         | Proteintech  | 21773-1-AP  |
| Occludin    | 1:100         | Abcam        | ab216327    |
| AQP4        | 1:250         | Proteintech  | 16473-1-AP  |

Supplementary Table 5. Primer Sequences

| Gene        | Sequence (5'-3')           |
|-------------|----------------------------|
| TIMP1       | F: GCAACTCGGACCTGGTCATAA   |
|             | R: CGGCCCGTGATGAGAACT      |
| β1-Integrin | F: ATGCCAAATCTTGCGGAGAAT   |
|             | R: TTTGCTGCGATTGGTGACATT   |
| IL-1α       | F: CGAAGACTACAGTTCTGCCATT  |
|             | R: GACGTTTCAGAGGTTCTCAGAG  |
| IL-1β       | F: GCAACTGTTCTGAACTCAACT   |
|             | R: ATCTTTTGGGGTCCGTCAACT   |
| TNF-α       | F: CCCTCACACTCAGATCATCTTCT |
|             | R: GCTACGACGTGGGCTACAG     |
| IL-6        | F: TAGTCCTTCCTACCCCAATTTCC |
|             | R: TTGGTCCTTAGCCACTCCTTC   |
| CD16        | F: CAGAATGCACACTCTGGAAGC   |
|             | R: GGGTCCCTTCGCACATCAG     |
| CD68        | F: TGTCTGATCTTGCTAGGACCG   |
|             | R: GAGAGTAACGGCCTTTTTGTGA  |
| iNOS        | F: GTTCTCAGCCCAACAATACAAGA |
|             | R: GTGGACGGGTCGATGTCAC     |
| β-Actin     | F: GGCTGTATTCCCCTCCATCG    |
|             | R: CCAGTTGGTAACAATGCCATGT  |

Supplementary Table 6. Antibodies for Immunoblotting and Immunoprecipitation

| Antibodies        | Concentration            | Manufacturer | Catalog No. |
|-------------------|--------------------------|--------------|-------------|
| β1-Integrin       | 1:1000 (WB)<br>1:50 (IP) | Proteintech  | 12594-1-AP  |
| ZO-1              | 1:1000 (WB)              | Proteintech  | 21773-1-AP  |
| Occludin          | 1:1000 (WB)              | Abcam        | ab216327    |
| Trim21            | 1:1000 (WB)<br>1:50 (IP) | Proteintech  | 67136-1-Ig  |
| PARP              | 1:1000 (WB)              | CST          | 9532        |
| cleaved-PARP      | 1:1000 (WB)              | CST          | 9548        |
| cleaved-Caspase 9 | 1:1000 (WB)              | CST          | 9509        |
| α-Tubulin         | 1:10000 (WB)             | Proteintech  | 66031-1-Ig  |



Supplementary Figures

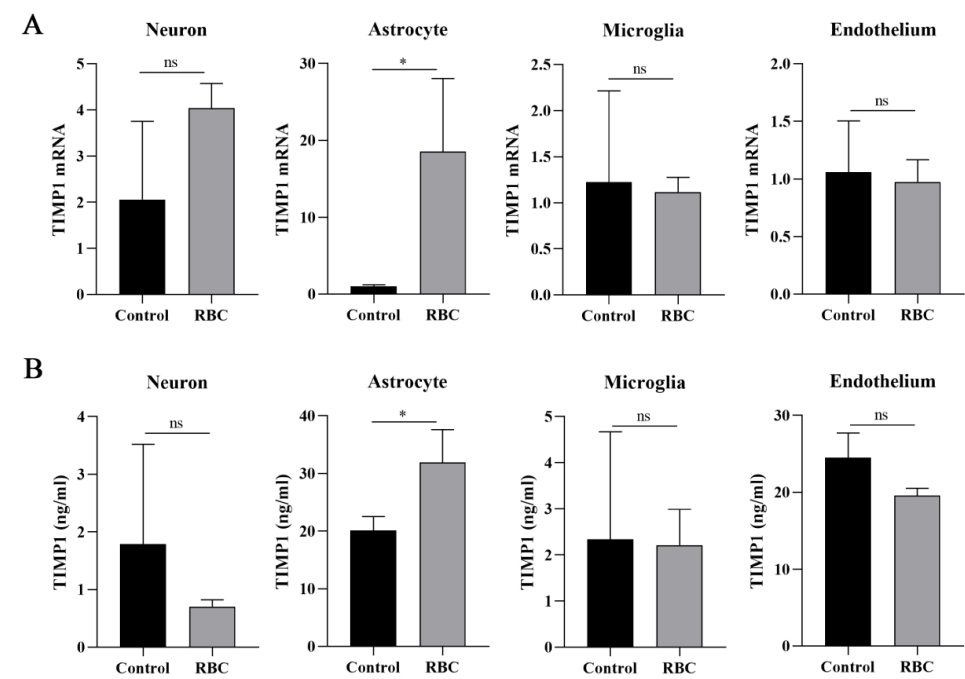

Supplementary Figure 1. RBC stimulation increased TIMP1 levels only in astrocytes. Transcriptional (A) and supernatant (B) TIMP1 levels in primary cultured cells stimulated with control or RBC. n = 3 dependent experiments. \*  $p < 0.05$ .

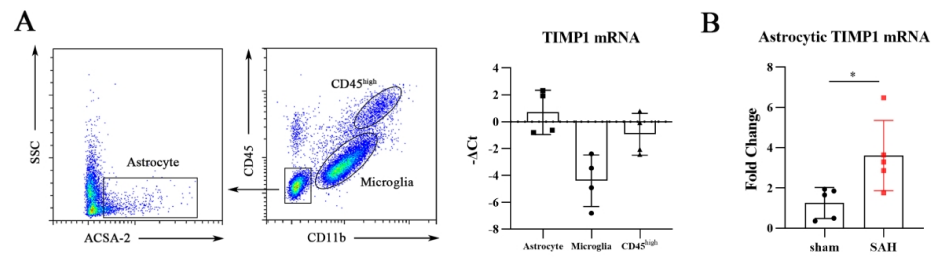

Supplementary Figure 2. TIMP1 is primarily expressed in astrocytes. A. mRNA levels of TIMP1 in astrocytes, microglia, and infiltrated cells sorted from SAH mouse brains via flow cytometry were detected at 1 day post-SAH. Four mice were analyzed. B. TIMP1 mRNA levels in astrocytes sorted from sham and SAH brains by magnetic adsorption were detected at 1 day post-SAH. n = 5 mice in each group.

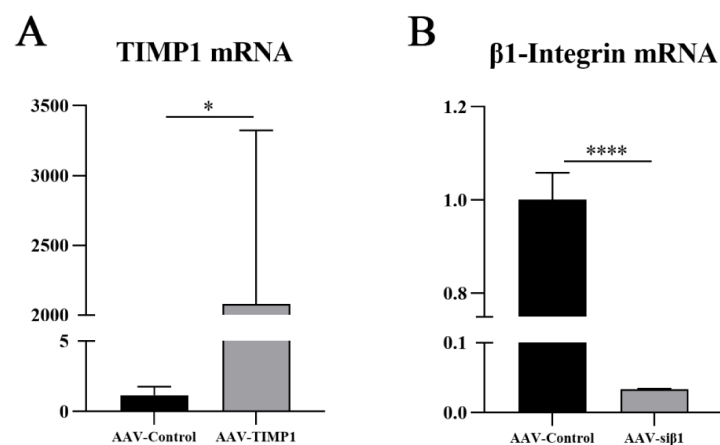

Supplementary Figure 3. Verification of transduction efficacy. TIMP1 (A) and  $\beta$ 1-Integrin (B) mRNA levels were detected in astrocytes sorted with magnetic absorption.  $n = 3$  mice in each group. \*  $p < 0.05$ , \*\*\*\*  $p < 0.0001$ .

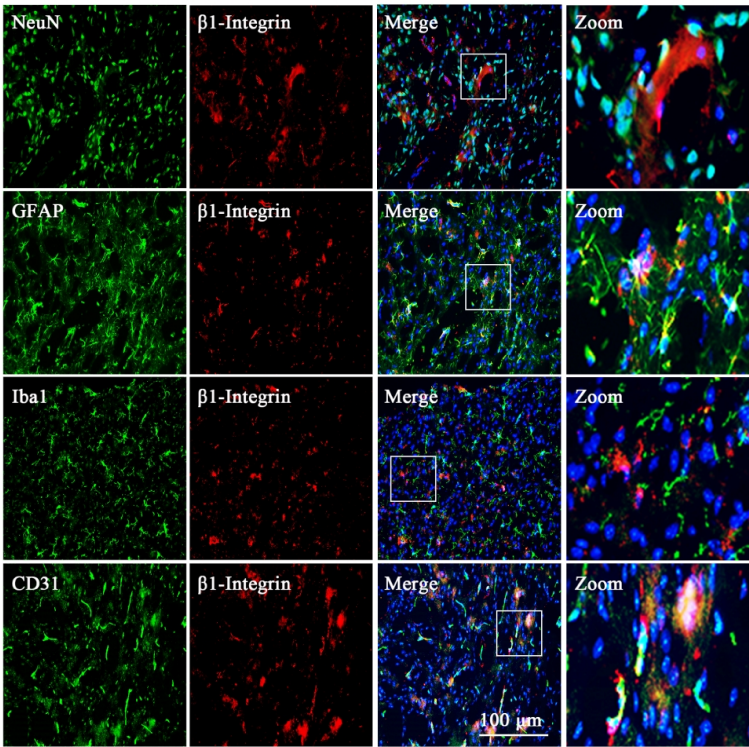

Supplementary Figure 4. Cellular co-localization of  $\beta$ 1-Integrin in sham-operated brains.

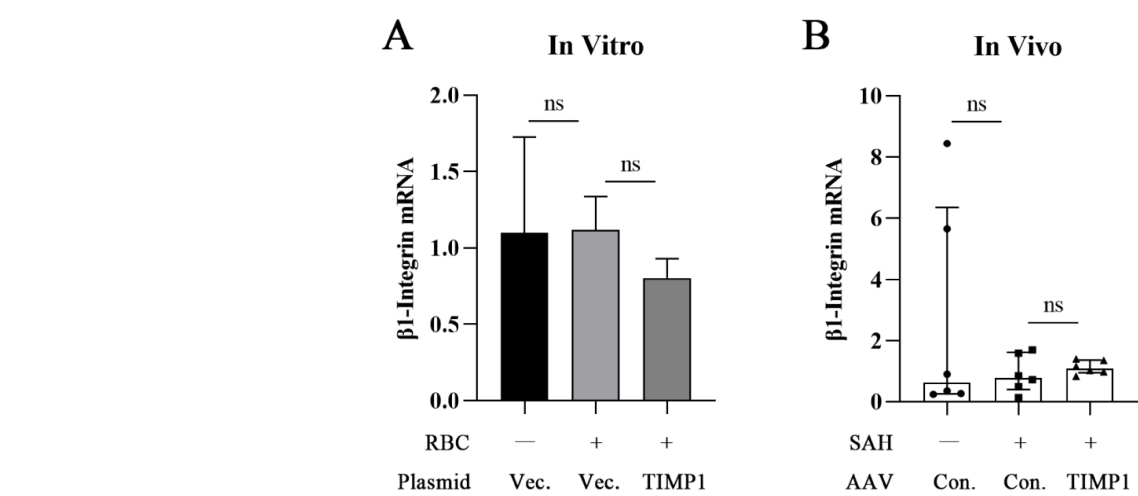

Supplementary Figure 5. RBC stimulation and TIMP1 overexpression could not affect mRNA levels of astrocytic  $\beta 1$ -Integrin both in vitro (A; n = 3 dependent experiments) and in vivo (B; n = 6 mice in each group).

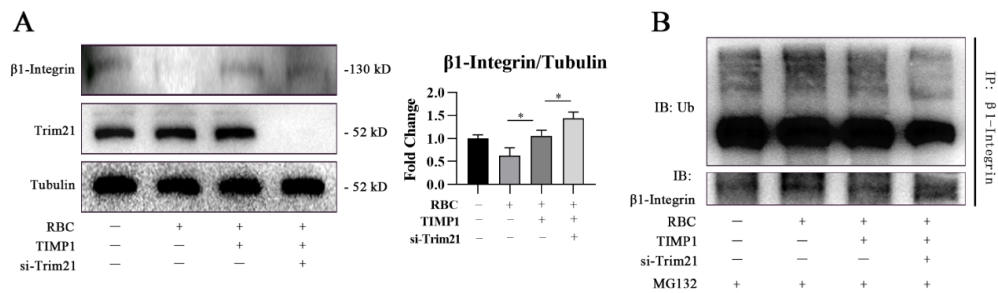

Supplementary Figure 6. Silence of Trim21 further ameliorated the levels of β1-Integrin. A. Western blotting analysis for levels of β1-Integrin in astrocytes. n = 3 dependent experiments. B. Detection of ubiquitination of β1-Integrin. \*  $p < 0.05$ .
